# Supplementary material for: Activation of the hypothalamic-pituitary adrenal axis in response to a verbal fluency task and associations with task performance
Source: PLoS One. 2020 Apr 16;15(4):e0227721. doi: 10.1371/journal.pone.0227721 (PMC7161971; doi:10.1371/journal.pone.0227721)
Supplement: S1 File — (XLSX) [file pone.0227721.s001.xlsx]

## Sheet: S1_Dataset
Sex	Age	BMI	BMI_group_WHO	MaritalStatus	Education	German	Profession	PublicEvent	Time_s0	Time_s0_category	Smoking	Alcohol_today	Alcohol	Sports	SportsType	SportsDays	Hypertension	OralContraceptives	PSS_scale	PSS_group	CESD_scale	CESD_group_Stein	PANAS_pos	PANAS_neg	cort_s0	cort_s1	cort_s2	cort_incr	ln_cort_s0	ln_cort_s1	ln_cort_s2	sAA_s0	sAA_s1	sAA_s2	sqrt_sAA_s0	sqrt_sAA_s1	sqrt_sAA_s2	Sys_t0	Sys_t1	Sys_t2	Dia_t0	Dia_t1	Dia_t2	MAP_t0	MAP_t1	MAP_t2	HR_t0	HR_t1	HR_t2
1	21	18.2066	1	1	5	1	2	0	11.72	1	3	3	7	1	1	2	0	1	24	2	22	1	2.8	1.4	2.5327	3.07225	3.07695	21.4889	0.929286	1.12241	1.12394	52.02	76.12	52.61	7.21249	8.72468	7.25328	133	123	133	95	81	85	110.656	98.304	104.776	65	59	72
1	20	19.7232	2	1	5	1	2	0	11.73	1	3	3	7	1	1	2	0	0	13	1	13	1	2.3	1.1	2.5074	2.55645	1.9521	-22.1464	0.919246	0.93862	0.668906	265.95	199.1	120.08	16.308	14.1103	10.9581	118	128	124	76	67	74	93.304	92.132	94.6	78	69	69
1	21	21.9713	2	1	5	1	2	0	11.8	1	3	3	7	1	12	2e-05	0	0	15	2	9	1	1.8	1	2.45835	2.9455	2.62225	6.66707	0.89949	1.08028	0.964033	130.74	170.94	208.06	11.4342	13.0744	14.4243	137	139	124	87	86	79	107.6	107.836	97.54	73	66	65
1	18	20.3244	2	3	5	1	1	0	12.67	2	3	3	7	1	12	3	0	0	18	2	13	1	3.1	1.4	4.11685	3.3789	3.1212	-24.1848	1.41509	1.21755	1.13822	71.57	87.71	56.78	8.45991	9.36536	7.53525	122	106	116	86	72	80	100.832	86.008	94.832	66	68	65
1	21	21.9671	2	3	5	1	3	0	12.5	2	3	3	2	1	1	5	0	0	22	2	10	1	3.4	1.5	2.52685	2.05275	2.052	-18.7922	0.926973	0.71918	0.718815	37.31	42.69	24.01	6.10819	6.53376	4.9	121	126	114	73	79	77	92.776	98.364	92.244	65	75	71
2	21	24.3072	2	3	5	1	3	0	12.5	2	3	3	2	1	12	4	0	0	12	1	11	1	4.3	2.1	4.4876	4.3231	9.0218	101.038	1.50132	1.46397	2.19964	331.22	238.17	291.57	18.1995	15.4328	17.0754	133	137	108	74	66	50	98.308	95.252	73.896	69	65	70
1	21	24.9649	2	1	6	1	3	0	11.42	1	3	3	1	1	2	3	0	0	8	1	12	1	2.7	1.2	1.50375	1.9691	3.6907	145.433	0.407962	0.677577	1.30582	198.07	184.71	160.82	14.0737	13.5908	12.6815	158	163	146	91	86	90	118.604	117.724	113.072	84	78	68
2	23	22.6347	2	1	6	1	3	0	11.7	1	3	3	7	1	1	2	0	0	9	1	3	1	2.9	1	1.56715	1.26685	1.49045	-4.89423	0.449259	0.236534	0.399078	164.89	302.8	306.26	12.841	17.4011	17.5003	122	118	121	77	77	84	95.54	93.892	99.244	68	71	69
1	19	27.0416	3	1	5	1	3	0	12.05	2	3	3	7	1	1	2	0	0	15	2	17	1	3	1.3	3.50095	5.16985	5.20725	48.7382	1.25303	1.64284	1.65005	155.26	181.03	153.85	12.4603	13.4547	12.4036	121	127	128	76	77	76	94.54	97.6	97.424	82	73	71
1	32	21.1927	2	2	7	1	7	1	18	2	3	3	7	1	12	4.5	0	0	11	1	16	1	2.5	1.8	1.4515	1.22645	1.1302	-22.1357	0.372598	0.204124	0.122395	144.72	136.26	73.38	12.03	11.673	8.56621	112	102	108	67	65	63	85.54	80.244	81.54	51	54	53
2	38	20.0617	2	1	3	1	5	0	18.07	3	1	3	3	1	1	3.5	0	0	13	1	14	1	2.6	1.5	2.23325	1.9554	1.89395	-15.1931	0.803458	0.670595	0.638665	59.28	178.41	277.76	7.69935	13.357	16.6661	141	136	147	89	94	95	110.424	111.304	116.424	75	72	79
1	69	22.0604	2	2	4	1	12	0	18	2	3	3	1	2	-66	-66	0	0	19	2	22	1	2.4	1.2	1.13548	1.2862	1.0889	-4.10181	0.127051	0.251692	0.085168	7.35	10.5	13.03	2.71109	3.24037	3.60971	136	153	159	81	88	84	103.66	114.78	114.9	82	82	87
1	50	19.052	2	2	3	1	5	1	19.35	3	3	3	2	1	1	2	0	0	10	1	6	1	4	0.9	1.58935	1.5687	1.333	-16.1292	0.463325	0.450247	0.287432	267.5	152.48	197.55	16.3554	12.3483	14.0552	176	169	151	96	81	104	128.96	117.256	123.364	89	70	83
2	54	24.6181	2	2	8	1	6	1	18.88	3	2	3	3	2	-66	-66	0	0	7	1	7	1	3.5	1.1	1.6108	2.1268	3.44975	114.164	0.476731	0.754619	1.2383	222.41	292.61	178.22	14.9134	17.1058	13.3499	192	168	154	98	99	101	136.728	127.428	122.836	90	96	79
1	34	25.5036	3	2	6	1	5	1	19.83	3	2	3	7	1	1	2	0	0	28	2	13	1	3.1	1.2	2.11825	3.30135	4.50465	112.659	0.75059	1.19433	1.50511	23.94	76.06	40.51	4.89285	8.72124	6.36475	116	128	114	82	90	85	96.008	105.656	96.948	80	86	76
2	57	41.4951	4	2	3	1	5	1	20.25	3	3	3	7	2	-66	-66	0	0	11	1	-99	-99	-99	-99	1.81725	1.51335	1.5527	-14.5577	0.597324	0.414326	0.439995	30.38	116.76	146.2	5.51181	10.8056	12.0913	152	160	157	100	108	102	121.424	129.424	124.66	84	85	84
2	18	21.9136	2	1	3	1	2	1	20.83	3	3	1	7	2	-66	-66	0	0	20	2	29	2	2.8	2.2	3.29775	4.6867	6.78515	105.751	1.19324	1.54473	1.91474	118.2	169.65	98.05	10.872	13.025	9.90202	148	146	144	86	88	82	111.544	111.896	107.544	80	74	74
1	44	29.737	3	3	5	1	7	1	21.27	3	3	3	6	2	1	-66	0	0	12	1	-99	-99	3.3	1	0.647495	0.678425	0.669525	3.40234	-0.434644	-0.387981	-0.401187	74.76	57.78	46.27	8.64639	7.60132	6.80221	129	127	127	83	86	82	101.952	102.892	100.54	70	75	75
2	48	30.1276	4	2	5	1	5	1	21.7	3	3	3	2	1	1	4	1	0	22	2	10	1	2.3	1	1.3376	1.7704	2.15755	61.3001	0.290877	0.571206	0.768973	115.76	177.3	164.84	10.7592	13.3154	12.839	148	135	140	95	88	87	116.836	107.364	108.836	82	82	79
2	60	27.7703	3	2	8	1	5	1	22.07	3	3	1	4	1	1	3	1	0	13	1	-99	-99	-99	-99	3.0418	4.97765	5.52705	81.7033	1.11245	1.60496	1.70965	31.6	63.78	41.4	5.62139	7.98624	6.43428	138	128	129	75	82	84	100.956	100.952	102.54	54	61	60
1	62	24.0238	2	2	8	1	5	1	22.62	3	3	3	1	1	1	3	0	0	19	2	11	1	3.9	1.2	1.64725	1.8577	3.45415	109.692	0.499107	0.619339	1.23958	179.94	208.78	227.46	13.4142	14.4492	15.0818	128	131	118	69	94	84	93.308	109.244	98.008	91	85	84
1	33	23.6652	2	5	6	1	5	1	23.52	3	3	3	7	1	13	7	0	1	13	1	12	1	2.3	1.6	1.05375	1.3259	1.6623	57.7509	0.0523552	0.282091	0.508202	35.09	43.28	34.37	5.92368	6.57875	5.86259	112	114	114	77	66	62	91.42	85.776	83.424	52	60	53
1	23	20.1956	2	3	5	1	3	0	12.28	2	3	3	7	1	1	4.5	0	0	8	1	9	1	3.4	1	3.32085	2.7802	3.03455	-8.62129	1.20022	1.02252	1.11006	173.23	95.28	109.23	13.1617	9.76115	10.4513	135	124	116	76	61	63	100.308	86.956	84.836	55	49	46
2	63	22.5309	2	2	8	1	7	1	21.08	3	3	1	3	1	1	5	1	0	21	2	14	1	1.3	1.4	1.8468	1.69695	3.1199	68.9355	0.613454	0.528833	1.1378	79.83	158.28	116.35	8.93476	12.5809	10.7866	174	-99	-99	-99	-99	-99	-99	-99	-99	-99	-99	-99
1	18	20.7612	2	1	5	1	3	0	12.12	2	3	3	7	1	1	2	0	0	25	2	17	1	2.2	1.4	1.9511	3.07635	4.99135	155.822	0.668393	1.12374	1.60771	83.62	91.06	50.56	9.1444	9.54254	7.11056	136	134	143	69	65	70	96.604	93.428	100.076	72	74	72
2	41	26.5928	3	2	6	1	5	1	20.68	3	3	1	7	2	-66	-66	1	0	18	2	19	1	3.1	1	0.62736	0.6566	0.515635	-17.8088	-0.466235	-0.42068	-0.662356	47.65	81.33	70.78	6.9029	9.01831	8.41309	136	127	125	86	85	87	106.6	102.304	102.656	76	76	73
2	36	25.335	3	1	2	1	13	1	20.23	3	3	3	2	2	-66	-66	0	0	18	2	18	1	-99	-99	0.996375	1.29215	1.8626	86.9376	-0.00363159	0.256307	0.621973	163.75	94.96	160.67	12.7965	9.74474	12.6756	137	132	149	90	93	96	109.364	109.068	117.836	78	64	62
1	57	31.2488	4	2	7	1	5	1	21.98	3	3	1	7	2	-66	-66	0	0	13	1	11	1	3.7	1	1.0772	0.959965	0.94659	-12.125	0.0743651	-0.0408585	-0.0548892	292.48	170.8	256.59	17.102	13.069	16.0184	174	161	158	106	107	103	134.016	129.248	125.66	77	72	69
2	40	25.335	3	1	5	1	5	1	22.88	3	3	1	4	1	1	5	0	0	3	1	10	1	4	1	0.556095	0.54207	0.613425	10.3094	-0.586816	-0.61236	-0.488697	70.94	69.95	79.07	8.42259	8.36361	8.89213	136	121	133	82	86	88	104.248	100.42	106.54	78	69	80
1	49	20.6612	2	2	7	1	5	1	23.67	3	3	3	3	1	13	4.5	0	0	11	1	3	1	3	1	3.45775	5.10335	5.2342	51.3759	1.24062	1.6299	1.65521	48.73	63.07	87	6.98069	7.94166	9.32738	128	129	123	86	92	91	103.304	107.244	104.184	57	60	58
1	19	20.1733	2	3	5	1	3	0	12.58	2	3	3	7	2	-66	-66	0	0	35	2	38	2	2.2	2.2	1.63715	1.39655	1.12485	-31.2922	0.492957	0.334005	0.11765	187.17	148.66	206.74	13.681	12.1926	14.3785	106	117	113	73	78	80	86.596	94.068	93.596	79	75	66
1	18	19.1327	2	1	5	1	3	0	14.75	2	3	3	7	1	1	2	0	0	15	2	8	1	2.3	1.1	7.2341	6.95005	6.6464	-8.12402	1.97881	1.93875	1.89408	85.36	108.05	95.69	9.23905	10.3947	9.78213	114	115	112	89	74	71	99.3	90.892	87.892	70	55	57
1	20	18.6122	2	1	5	1	3	0	14.28	2	3	3	7	1	12	3	0	0	13	1	8	1	3.6	1.3	2.2446	3.7845	5.0778	126.223	0.808527	1.33091	1.62488	62.04	117.91	71.67	7.87655	10.8586	8.46581	120	126	125	82	83	75	97.656	100.716	95.6	55	58	53
1	19	20.4152	2	1	5	1	3	0	13.07	2	3	3	7	1	12	5	0	0	8	1	4	1	4.2	1.1	1.58725	1.5702	1.77155	11.6113	0.462003	0.451203	0.571855	52.7	48.32	21.85	7.25948	6.95126	4.6744	131	121	120	81	81	75	101.6	97.48	93.54	74	64	73
2	37	23.8884	2	1	3	1	5	1	18.43	3	1	3	3	2	-66	-66	0	0	2	1	5	1	4.2	1.4	9.75385	6.3033	5.8565	-39.957	2.27766	1.84107	1.76755	140.22	107.65	132.22	11.8415	10.3755	11.4987	140	152	144	91	97	95	111.188	119.66	115.188	91	80	86
1	25	28.7356	3	3	6	1	5	1	19.42	3	3	1	2	1	3	1	0	0	9	1	7	1	3.7	1.3	0.5384	0.96277	0.947605	76.0039	-0.619154	-0.0379407	-0.0538175	84.68	116.08	99.44	9.20217	10.774	9.97196	131	129	140	87	81	85	105.128	100.776	107.66	75	76	81
2	24	19.7363	2	1	7	1	5	1	22.45	3	3	3	4	1	12	2	0	0	9	1	8	1	2.9	1.6	0.71454	0.831005	1.5173	112.346	-0.336116	-0.185119	0.416932	199.77	236.48	239.46	14.134	15.3779	15.4745	-99	-99	-99	-99	-99	-99	-99	-99	-99	-99	-99	-99
2	30	25.2493	3	1	5	1	3	0	13.75	2	3	3	7	1	12	6	0	0	13	2	14	1	2.4	1.5	4.93685	7.70815	10.7535	117.821	1.59673	2.04228	2.37523	3.9	5.3	1.88	1.97484	2.30217	1.37113	152	159	145	85	90	88	112.604	118.428	111.484	67	70	69
1	29	30.854	4	1	2	1	5	1	23.27	3	1	3	7	2	-66	-66	0	0	17	2	12	1	1.9	1	4.42985	4.1905	3.9565	-10.6855	1.48837	1.43282	1.37536	87.37	61.29	20.4	9.34719	7.82879	4.51664	123	131	122	83	87	90	99.48	105.128	103.184	72	77	70
1	28	20.4491	2	1	7	1	5	1	19.82	3	3	3	7	1	123	2	0	0	28	2	27	2	4.1	1.1	1.03046	1.07356	1.0889	5.67125	0.0300053	0.0709756	0.085168	100.47	140.39	152.55	10.0235	11.8486	12.3511	129	138	129	80	89	80	100.188	109.188	100.188	77	89	74
1	51	24.4898	2	2	7	1	5	1	24.53	3	1	1	7	1	1	-66	0	0	4	1	10	1	2.7	1	0.583355	0.507205	0.60332	3.42244	-0.538959	-0.67884	-0.505308	66.17	60.93	96.79	8.13449	7.80577	9.83819	116	112	124	75	72	74	91.892	88.48	94.6	57	60	56
1	63	20.0877	2	1	4	1	13	1	18.9	3	3	3	7	1	1	4	0	0	16	2	13	1	2.4	1	0.72093	0.704625	0.62302	-13.5811	-0.327213	-0.35009	-0.473177	259.39	243.01	219.16	16.1056	15.5888	14.8041	114	118	129	86	83	85	97.536	97.42	103.128	72	69	67
2	60	30.6689	4	2	2	1	5	1	24.15	3	3	3	3	2	-66	-66	0	0	16	2	9	1	-99	-99	0.99185	0.899155	1.161	17.054	-0.00818339	-0.1063	0.149282	74.85	68.68	80.82	8.65159	8.28734	8.98999	125	120	133	82	81	84	99.716	97.068	104.188	68	66	63
1	35	20.8209	2	1	3	1	5	1	24.43	3	1	1	2	2	-66	-66	0	0	16	2	20	1	2.6	1	1.45235	1.22835	1.27395	-12.2835	0.373183	0.205672	0.242122	79.79	48.86	40.84	8.93252	6.98999	6.39062	108	116	104	78	78	80	90.36	93.656	89.888	69	78	79
1	22	22.8374	2	1	3	1	5	1	24.82	3	3	3	1	1	13	1.5	0	0	20	2	28	2	1.9	1.4	3.48935	4.88045	7.03145	101.512	1.24972	1.58524	1.95039	48.54	42.89	47.04	6.96707	6.54905	6.85857	129	116	109	79	71	74	99.6	89.54	88.42	97	87	91
1	21	24.0055	2	1	5	1	3	0	10.38	1	3	3	7	1	1	1	0	1	18	2	17	1	2	2.1	7.3378	7.9736	9.57	30.4206	1.99304	2.07614	2.25863	107.64	118.91	111.33	10.375	10.9046	10.5513	123	122	123	80	78	77	97.716	96.128	95.952	72	73	77
2	50	21.7982	2	2	5	1	5	1	23.78	3	3	1	4	2	-66	-66	0	0	15	2	11	1	2.4	1.1	0.767535	1.0696	2.00625	161.389	-0.264571	0.0672847	0.696267	94.46	68.87	79.23	9.71905	8.2988	8.90112	112	129	126	80	79	84	93.184	99.6	101.304	58	58	59
1	19	19.3821	2	3	5	1	3	0	10.97	1	3	3	7	1	1	2.5	0	1	6	1	7	1	3.2	1.1	7.33405	6.98515	7.67075	4.59091	1.99253	1.94379	2.03741	25.55	31.36	38.37	5.0547	5.6	6.19435	119	111	117	81	78	75	96.656	91.596	92.304	65	69	66
2	21	18.4992	1	1	5	1	3	0	11.6	1	3	3	7	2	-66	-66	0	0	11	1	4	1	3.2	1.4	3.01845	2.8068	3.4116	13.0249	1.10474	1.03205	1.22718	68.15	24.32	59.05	8.2553	4.93153	7.6844	140	147	140	88	93	89	109.424	115.248	110.012	81	83	83
2	59	24.5693	2	1	7	1	5	1	24.58	3	3	3	3	1	1	5	0	0	21	2	15	1	3.1	1	1.12736	1.01826	1.3824	22.6228	0.119879	0.0181002	0.323821	20.59	12.57	9.54	4.53762	3.54542	3.08869	122	123	121	81	76	76	97.892	95.364	94.54	76	67	68
1	19	22.2291	2	3	4	1	2	1	23.37	3	3	3	1	1	12	1.5	0	0	32	2	37	2	2.5	2	0.649465	0.64144	1.1594	78.5162	-0.431606	-0.44404	0.147903	93.39	131.78	198.78	9.66385	11.4795	14.0989	147	137	116	90	90	85	113.484	109.364	97.772	80	85	78
1	22	24.9135	2	1	5	1	3	0	12.23	2	2	3	7	1	12	5	0	0	25	2	24	2	3.4	1.5	1.7107	1.66175	1.79225	4.76705	0.536903	0.507871	0.583472	69.46	42.37	31.11	8.33427	6.50922	5.57763	127	118	111	72	76	73	94.66	93.304	88.656	63	61	57
1	29	40.5696	4	1	3	1	5	1	23	3	3	3	7	1	12	2	0	0	17	2	-99	-99	-99	-99	0.92096	1.0797	1.1648	26.4767	-0.0823387	0.0766832	0.152549	239.41	141.68	98.52	15.4729	11.9029	9.92572	120	128	124	89	89	89	101.772	105.068	103.42	76	73	74
1	35	22.2656	2	1	5	1	3	0	12.45	2	3	3	1	1	3	2	0	0	12	1	3	1	3.8	1.8	2.0621	2.2251	4.03085	95.4731	0.723725	0.799802	1.39398	26.34	35.82	20.84	5.13225	5.98498	4.56508	121	114	119	76	85	69	94.54	96.948	89.6	71	70	68
2	40	23.0577	2	2	9	1	7	1	19.48	3	2	1	3	1	3	3	0	0	12	1	9	1	3.5	1.4	1.6752	1.56015	1.22075	-27.1281	0.515933	0.444782	0.199465	148.17	193.97	222.09	12.1725	13.9273	14.9027	133	133	129	88	84	82	106.54	104.188	101.364	90	88	88
1	25	20.7008	2	3	6	1	5	1	21.1	3	3	3	2	1	1	1	0	0	16	2	12	1	3.6	1.1	1.28055	1.29285	1.2494	-2.43255	0.24729	0.256849	0.222663	56.35	34.87	56.01	7.50666	5.90508	7.48398	147	119	126	118	81	89	129.948	96.656	104.244	73	71	69
2	24	23.5898	2	3	6	1	3	0	11.43	1	3	3	2	1	1	7	0	0	9	1	9	1	4.2	1.3	5.86885	7.4753	7.7827	32.6103	1.76966	2.0116	2.0519	89.85	103.02	35.07	9.47892	10.1499	5.92199	82	140	114	63	86	69	70.828	108.248	87.54	83	88	85
2	36	23.5102	2	3	6	1	5	1	19.83	3	2	3	2	1	1	1	0	0	8	1	2	1	4.1	1.5	0.89852	0.842715	1.13965	26.8364	-0.107006	-0.171126	0.130721	109.3	123.77	148.62	10.4547	11.1252	12.191	162	164	162	101	94	94	126.132	122.84	122.016	74	77	79
1	18	24.0569	2	1	5	1	3	0	9.55	1	2	3	2	1	1	1	0	0	22	2	19	1	2.4	1.5	7.0314	5.89765	4.8468	-31.0692	1.95039	1.77455	1.57832	33.7	9.94	25.68	5.80517	3.15278	5.06754	126	118	118	75	74	75	96.012	92.128	92.716	69	62	78
1	20	25.1559	3	1	5	1	3	0	11.55	1	3	3	4	2	-66	-66	0	0	18	2	15	1	3.3	1.4	3.6608	3.84535	2.76435	-24.4878	1.29768	1.34686	1.01681	79.7	114.75	119.42	8.92749	10.7121	10.9279	107	114	119	67	70	72	83.48	88.128	91.364	72	72	64
2	63	26.8555	3	2	8	1	12	1	22.57	3	3	3	6	1	12	2	1	0	10	1	-99	-99	-99	-99	1.42275	2.52395	3.20685	125.398	0.352592	0.925825	1.16529	114.89	96.92	102.64	10.7187	9.8448	10.1311	178	178	179	90	85	93	126.256	123.316	128.432	70	71	75
2	29	23.7353	2	3	5	1	3	0	13.73	2	3	3	7	1	2	4	0	0	22	2	22	1	2	1.9	3.2514	5.1879	6.3904	96.543	1.17909	1.64633	1.8548	151.12	151.55	82.26	12.2931	12.3106	9.06973	144	143	122	86	79	75	109.896	105.368	94.364	92	88	88
1	59	22.0243	2	6	3	1	5	1	22.5	3	3	3	2	1	12	3	0	0	9	1	11	1	3.7	1.2	0.52074	0.848065	1.2452	139.121	-0.652504	-0.164798	0.219296	33.82	40.65	42.61	5.8155	6.37574	6.52763	129	121	123	76	91	81	97.836	103.36	98.304	53	61	56
1	24	24.093	2	3	6	1	3	1	20	3	3	3	7	1	12	3	0	0	10	1	12	1	2.9	1.1	0.508745	0.754515	0.653205	28.3954	-0.675808	-0.28168	-0.425864	85.19	137.53	138.8	9.22984	11.7273	11.7813	142	111	128	87	83	90	109.66	94.536	105.656	83	65	68
1	47	26.0262	3	2	7	1	5	1	21.62	3	3	3	7	2	-66	-66	0	0	24	2	20	1	3.4	2.1	1.1112	2.15275	2.88895	159.985	0.105441	0.766746	1.06089	58.32	36.3	37.89	7.63675	6.02495	6.15549	144	146	139	98	101	104	116.952	119.54	118.42	64	67	64
1	19	21.2306	2	3	5	1	3	0	9.58	1	3	3	1	1	1	2.5	0	0	15	2	5	1	2.6	1.2	4.2762	3.7155	3.1153	-27.1479	1.45306	1.31251	1.13633	148.67	85.11	51.74	12.193	9.22551	7.19305	109	106	108	77	75	77	90.184	87.772	89.772	75	75	76
1	22	35.629	4	1	3	1	5	1	24.68	3	3	3	7	2	-66	-66	0	1	20	2	23	2	3.4	1.7	2.0091	2.4774	2.16155	7.58797	0.697687	0.90721	0.770826	140.16	101.7	139.61	11.8389	10.0846	11.8157	140	139	131	94	93	96	112.952	111.952	110.42	101	99	99
1	20	24.9337	2	3	5	1	3	0	14.2	2	1	3	5	1	2	2	0	1	15	2	22	1	2.4	1.7	2.22915	1.9572	1.74215	-21.8469	0.80162	0.671515	0.55512	42.08	63.73	76.31	6.48691	7.98311	8.73556	139	139	137	95	95	97	113.128	113.128	113.48	86	87	81
2	31	26.3151	3	3	4	1	5	1	22.97	3	1	3	6	1	1	6	0	0	9	1	16	1	2	1.5	0.337655	0.59616	0.719495	113.086	-1.08573	-0.517246	-0.329206	98.51	10.34	57.85	9.92522	3.21559	7.60592	124	126	126	86	88	88	101.656	103.656	103.656	83	79	70
1	22	19.6927	2	1	6	1	3	0	11.6	1	3	3	2	1	12	5	0	0	21	2	14	1	3	1.2	7.0336	9.6586	9.2516	31.5343	1.9507	2.26785	2.2248	43.67	36.74	34.48	6.60833	6.06135	5.87197	130	107	123	86	75	78	104.128	88.184	96.54	74	47	75
1	25	20.5499	2	3	7	1	1	1	22.08	3	3	3	2	1	1	1	0	1	12	1	11	1	3.4	1.1	1.18955	0.963075	1.06535	-10.4409	0.173575	-0.037624	0.0633034	147.22	108.63	39.1	12.1334	10.4226	6.253	131	117	112	77	72	70	99.248	90.54	87.304	68	62	64
1	45	26.8136	3	2	7	1	5	1	20.37	3	3	3	2	1	13	4	0	0	15	2	12	1	3.5	1.1	2.0378	2.0999	1.58375	-22.2814	0.711871	0.74189	0.459795	20.62	41.72	44.09	4.54093	6.4591	6.64003	112	115	116	78	78	80	92.008	93.244	94.832	75	77	72
1	31	24.9896	2	1	3	1	5	1	24.32	3	3	3	1	2	-66	-66	0	0	9	1	10	1	2.5	1	4.46835	5.1102	5.52845	23.7246	1.49702	1.63124	1.70991	234.87	217.41	125.84	15.3255	14.7448	11.2178	137	136	119	80	73	77	103.484	98.956	94.304	89	83	86
2	18	19.1881	2	1	5	1	3	0	14.2	2	3	3	1	2	-66	-66	0	0	18	2	9	1	4.3	1.3	0.941345	0.72391	0.93891	-0.258672	-0.0604456	-0.323088	-0.0630357	40.25	48.99	37.65	6.34429	6.99929	6.13596	137	132	128	93	94	85	111.128	109.656	102.716	111	88	88
1	26	21.7776	2	1	6	1	5	1	21.2	3	3	3	7	2	-66	-66	0	1	12	1	14	1	3.3	1.6	0.732355	0.76223	0.73307	0.0976302	-0.31149	-0.271507	-0.310514	65.96	104.65	86.31	8.12158	10.2299	9.29032	152	152	163	95	99	100	118.484	120.836	125.956	82	81	84
1	63	24.1965	2	2	5	1	7	1	23.82	3	3	3	7	1	1	3	0	0	14	2	8	1	2.9	1.1	7.29365	6.44495	6.3292	-13.2231	1.987	1.8633	1.84517	68.68	71.22	75.08	8.28734	8.43919	8.66487	114	108	105	80	76	71	94.008	89.184	85.008	101	105	91
1	21	22.4323	2	3	5	1	3	0	14.68	2	2	3	4	1	1	1	0	1	27	2	37	2	2.7	1.8	1.4117	1.2672	1.37335	-2.71658	0.344795	0.23681	0.317253	85.19	65.83	67.83	9.22984	8.11357	8.2359	132	134	139	75	69	71	98.484	95.78	99.016	51	50	52
1	53	21.3039	2	2	2	1	5	0	17.98	2	3	3	7	2	-66	-66	0	1	14	2	9	1	-99	-99	0.731755	0.71419	0.710745	-2.87118	-0.31231	-0.336606	-0.341442	70.83	42.72	52.29	8.41606	6.53605	7.23118	112	106	107	80	77	68	93.184	88.948	84.068	72	71	67
1	29	21.3675	2	1	6	1	5	1	17.55	2	3	3	3	2	-66	-66	0	0	25	2	22	1	2.5	2	1.3911	1.08795	1.15255	-17.1483	0.330095	0.0842952	0.141977	186.1	176.49	207.9	13.6418	13.285	14.4187	126	124	116	87	82	78	103.068	99.304	93.656	78	73	72
1	51	20.2812	2	2	5	1	7	1	18.78	3	3	3	3	1	1	2	0	0	10	1	11	1	3.5	1	0.85594	0.981465	1.1021	28.759	-0.155555	-0.0187089	0.0972175	143.23	141.77	187.1	11.9679	11.9067	13.6785	116	120	108	74	70	69	91.304	90.6	85.068	72	69	72
2	21	23.848	2	3	4	1	3	1	23.42	3	3	3	7	1	12	3.5	0	0	16	2	11	1	3.9	2.2	0.495195	0.52932	2.0188	307.678	-0.702804	-0.636162	0.702503	83.08	119.73	104.9	9.11482	10.9421	10.2421	142	136	136	80	83	91	105.544	104.836	109.54	70	83	74
1	19	24.7252	2	3	5	1	3	0	9.07	1	3	3	3	1	1	1	0	1	11	1	8	1	4.1	1.1	10.6904	12.795	13.7955	29.0457	2.36935	2.54905	2.62434	109.26	115.14	68.37	10.4528	10.7303	8.26862	158	161	144	94	92	91	120.368	120.428	112.836	92	91	80
1	20	25.1532	3	1	5	1	3	0	13.35	2	3	3	1	1	1	4	0	0	36	2	55	2	1.8	3.3	2.46355	3.4138	4.02205	63.2624	0.901603	1.22783	1.39179	62.47	87.5	46.34	7.9038	9.35414	6.80735	124	120	113	84	85	80	100.48	99.42	93.596	92	91	90
1	25	22.0317	2	1	7	1	5	0	14.53	2	3	3	7	1	1	2.5	0	0	14	2	25	2	3.8	1.3	3.8469	3.89525	2.4916	-35.231	1.34727	1.35976	0.912925	42.85	42.61	40.65	6.54599	6.52763	6.37574	123	120	120	82	80	81	98.892	96.48	97.068	58	64	65
1	20	19.721	2	1	5	1	3	0	14.1	2	3	3	2	1	1	3	0	0	10	1	4	1	3.1	1.1	2.4553	3.188	2.97345	21.1033	0.898249	1.15939	1.08972	33.82	38.96	34.83	5.8155	6.24179	5.90169	125	125	112	77	80	77	96.776	98.54	91.42	93	93	86
[truncated: 22 more columns]
